# Supplementary material for: Production of salidroside in metabolically engineered Escherichia coli
Source: PubMed Central journal article supplement — Sci Rep. 2014 Oct 17;4:6640. doi: 10.1038/srep06640 (PMC4200411; doi:10.1038/srep06640), 2014-10-17
Supplement: srep06640-s1.pdf [file srep06640-s1.pdf]

## SUPPLEMENTARY MATERIAL

### Production of salidroside in metabolically engineered

#### *Escherichia coli*

Yanfen Bai<sup>#</sup>, Huiping Bi<sup>#</sup>, Yibin Zhuang, Chang Liu, Tao Cai, Xiaonan Liu, Xueli Zhang, Tao Liu\*, Yanhe Ma

#### Pathway and plasmids construction

All the primers used for gene amplification were listed as Table S2.

The pyruvate decarboxylase gene *ARO10*, was amplified from *Saccharomyces cerevisiae* S288 genome with primer pair aro-5FPNco and aro-3RPSac, the PCR fragment was digested with *NcoI* and *SacI*, and ligated into pTrcHisB, generating the plasmid pTrc1. *73B6<sup>syn</sup>* was amplified by PCR with primers UGT-5FPNco and UGT-3RPBam, and the resulting DNA fragment was cloned into vector pTrcHisB via restriction sites *NcoI* and *BamHI* to give the plasmid pTrc-UGT. This plasmid was then used as template, and PCR was conducted with primers TrcUGT-5FPBgl/UGT-3RPBam to amplify the gene fragment *73B6<sup>syn</sup>* under control of a trc promoter. Then this fragment was cloned into pTrc1 plasmid with *BglII* and *BamHI* restriction sites to give the plasmid pTrc2.

The plasmid pBbA5c was modified in order to incorporate multiple cloning sites (MCS) designed to facilitate the addition of future genes. Briefly, the fragment containing *BglIII*, *PstI*, *NotI*, *AflIII*, *PacI* and *NheI* restriction sites was amplified with the primers MCS-5FPBgl/MCS-3RPNhe using plasmid pACYCDuet-1 as the template. Then this fragment was digested by *BglIII* and *NheI*, and ligated into the same restriction sites of plasmid pBbA5c to yield the plasmid pBb0, a pBbA5c derivative with novel MCS.

The *tyrA<sup>\*syn</sup>* was amplified with primer pair Ptet-tyrA-5FPPst/tyrA-3RPPst to generate a

DNA fragment with the upper end flanking with the constitutive  $P_{Ltet}$  promoter and RBS sequence. The fragment was then digested and ligated into pBb0 via the *PstI* site to give the plasmid pBbA5c-tyrA<sup>\*syn</sup>. To facilitate cloning the following genes downstream of *tyrA*<sup>\*syn</sup>, the direction of gene *tyrA*<sup>\*syn</sup> on this plasmid was opposite to gene *lacI*. Subsequently, gene *aroG*<sup>\*syn</sup> was amplified with the primer pair aroG-5FPPst/aroG-3RPNnot using the synthesized gene as the template, and the resulting gene fragment with individual RBS was then cloned into pBbA5c-tyrA<sup>\*syn</sup> via *PstI* and *NotI* sites to yield the plasmid pBbA5c-tyrA<sup>\*syn</sup>-aroG<sup>\*syn</sup>. The gene *ppsA* was amplified using the primer pair ppsA-5FPNnot/ppsA-3RPAfl, and cloned into the plasmid pBbA5c-tyrA<sup>\*syn</sup>-aroG<sup>\*syn</sup> via restriction sites *NotI* and *AflIII*, generating the plasmid pBb1. Thus the three genes *tyrA*<sup>\*syn</sup>, *aroG*<sup>\*syn</sup> and *ppsA* were driven by the  $P_{Ltet}$  promoter in an operon.

The gene *tktA* was amplified using primer pair tktA-5FPBgl and tktA-3RPPac, and the PCR product was digested with *BglIII* and *PacI*, and cloned into pBb0 under control of the  $P_{lacUV5}$  promoter. The  $P_{lacUV5}$ -*tktA* fragment was amplified from the above plasmid with primers Plac-tktA-5FPAfl/tktA-3RPPac by PCR, and the gene product was digested, and inserted into the plasmid pBb1 via *AflIII* and *PacI* restriction sites. The resulting plasmid was designated as pBb1-tktA. The *aroE* gene was amplified from the genome of *E. coli* MG1655 by PCR with primers aroE-5FPPac and aroE-3RPNhe, and the resulting DNA fragment was subsequently cloned into pBb1-tktA via restriction sites *PacI* and *NheI* yielding plasmid pBb2

The *aroD* gene was amplified from the genome of *E. coli* MG1655 by PCR with primers aroD-5FPBam and aroD-3RPPst, and the resulting DNA fragment was digested with *BamHI* and *PstI*, and cloned into pBb0 downstream of the  $P_{lacUV5}$  promoter, generating pBbA5c-aroD. The codon-optimized variant of *aroB*<sup>op</sup> gene fragment was generated by PCR with the primers

aroB-5FPPst/aroB-3RPNhe. The yielding DNA fragment containing the variant of *aroB<sup>op</sup>* was digested with *Pst*I and *Nhe*I, and ligated into pBbA5c-aroD, generating plasmid pBbA5c-aroD-aroB<sup>op</sup>. The P<sub>lacUV5</sub> driven *aroD* and *aroB<sup>op</sup>* fragment was amplified by PCR from above plasmid with primers Plac-5FPNhe/aroD-3RPNhe. The resulting DNA fragment was then digested with *Nhe*I, and inserted into plasmid pBb2, yielding pBb3.

### <sup>1</sup>H-NMR for salidroside

(600 MHz, DMSO-*d*<sub>6</sub>): 9.15 (s, 1H); 7.02 (d, *J* = 10.0, H-C(10,14)); 6.64 (d, *J* = 10.0, H-C(11,13)); 4.95 (s, OH); 4.92 (s, OH); 4.88 (s, OH); 4.47 (t, *J* = 5.0, OH); 4.15 (d, *J* = 10.0, H-C(1)); 3.85 (dt, *J* = 5.0, 10.0, Ha-C(7)); 3.64 (dd, *J* = 5.0, 10.0, Ha-C(6)); 3.54 (dt, *J* = 5.0, 10.0, H<sub>b</sub>-C(7)); 3.40 (m, H<sub>b</sub>-C(6)); 3.09 (m, H-C(3)); 3.05 (m, H-C(5)); 3.02 (m, H-C(4)); 2.94 (m, H-C(2)); 2.71 (m, CH<sub>2</sub>(8))

Fig. S1 <sup>1</sup>H spectrum of salidroside

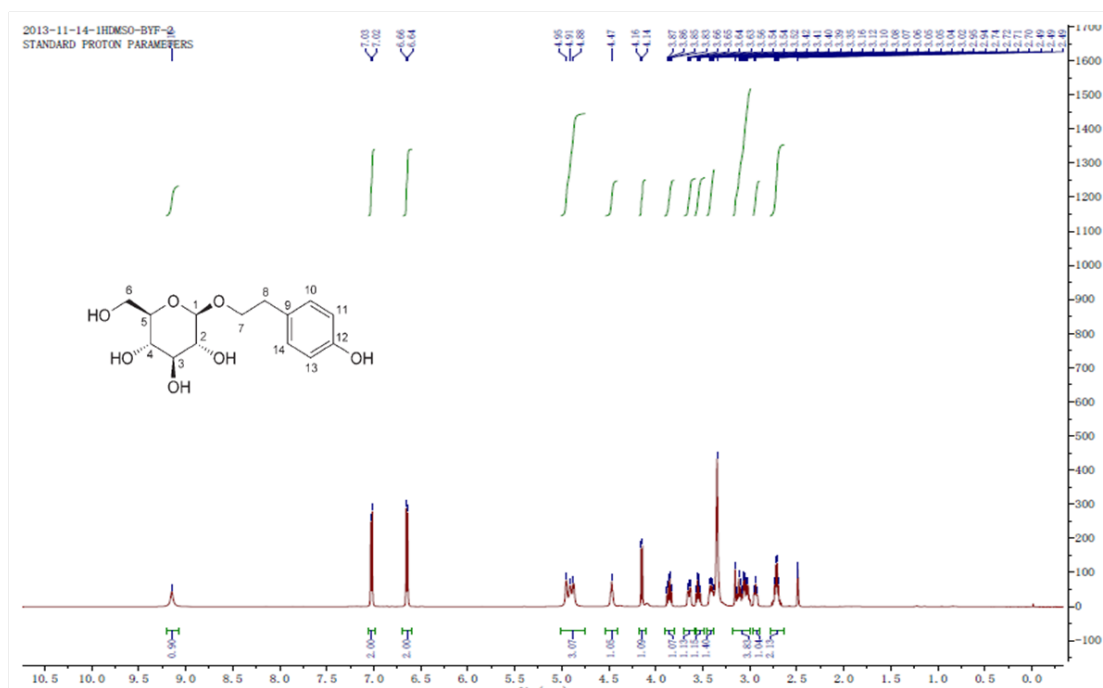

**Table S1. Primers used for gene deletion in this study**

| <b>Primers name</b> | <b>Sequence(5'→3')</b>                                                       |
|---------------------|------------------------------------------------------------------------------|
| feaB-5FPL           | ATGACAGAGCCGCATGTAGCAGTATTAAGCCAGGTCC<br>AACAGTTTCTCAGCGATTGTGTAGGCTGGAG     |
| feaB-3RPL           | TTAATACCGTACACACACCGACTTAGTTTCACACCAAC<br>CGTCCAGCCATAACGGCTGACATGGGAATTAG   |
| feaBGD-5FP          | TACACCCGTGTAACGCTCAG                                                         |
| feaBGD-3RP          | TTGACGAAACGCCAACGCTA                                                         |
| pykF-5FPL           | AAGCAAGTTTCTCCCATCCTTCTCAACTTAAAGACTAA<br>GACTGTCATGAGCGATTGTGTAGGCTGGAGCT   |
| pykF-3RPL           | TTACAGGACGTGAACAGATGCGGTGTTAGTAGTGCCG<br>CTCGGTACCAGTAACGGCTGACATGGGAATTAG   |
| pykFGD-5FF          | CACGTTGGGCTGAGACACAAGC                                                       |
| pykFGD-3RI          | CAGGATGCTTCCATCGGATTCATC                                                     |
| tyrR-5FPL           | ATGCGTCTGGAAGTCTTTTGTGAAGACCGACTCGGTC<br>TGACCCGCGAAAGCGATTGTGTAGGCTGGAG     |
| tyrR-3RPL           | TTACTCTTCGTTCTTCTTCTGACTCAGACCATATTCCTCCG<br>CAACTTATTAAACGGCTGACATGGGAATTAG |
| tyrRGD-5FP          | TTTTGCCGGAGCCAGCGAACTGGTGCG                                                  |
| tyrRGD-3RP          | CTGCGGCGCAGAAGGTCTGAACAACG                                                   |
| pykA-5FPL           | ATGTCCAGAAGGCTTCGCAGAACAAAAATCGTTACCA<br>CGTTAGGCCCAAGCGATTGTGTAGGCTGGAG     |
| pykA-3RPL           | TTACTCTACCGTTAAAATACGCGTGGTATTAGTAGAAC<br>CCACGGTACTTAACGGCTGACATGGGAATT     |
| pykAGD-5FI          | GCAATTACCCTCGACGTACC                                                         |
| pykAGD-3RI          | ATGATGGCAAGACGCATCGTC                                                        |
| pheA-5FPL           | AACACTATGACATCGGAACCATGGAACCCGTTACTGG<br>CGCTGCGAGAGAGCGATTGTGTAGGCTGGAGCT   |
| pheA-3RPL           | TCAGGTTGGATCAACAGGCACCCATGGTACGTTCTCA<br>CTTGGGTAACATAACGGCTGACATGGGAATTAG   |
| pheAGD-5FI          | TGAATGGGAGGCGTTTCGTCGT                                                       |
| pheAGD-3RI          | GTTATTGCGTCAGGCCAATGAC                                                       |

**Table S2. Primers used for pathway construction and gene overexpression in this study**

| <b>Primers name</b> | <b>Sequence(5' →3' )</b>                                                                                                                                                   |
|---------------------|----------------------------------------------------------------------------------------------------------------------------------------------------------------------------|
| MCS-5FPBgl          | <u>AGATCT</u> AAGCTTATCGATCTGCAGGCGCCGCCATA<br>TGGGTACCCTTAAGCCCCGGGGGCGAAACCCGACAG<br>GACTATAAA                                                                           |
| MCS-3RPNhe          | <u>GCTAGCG</u> GATATCTTAATTAAGTCGACCCCGGGGCGC<br>GTAATCTCTTGCTCTGAAAA                                                                                                      |
| Ptet-tyrA-5FPPst    | <u>AACTGCAGT</u> CCCTATCAGTGATAGAGATTGACATCC<br>CTATCAGTGATAGAGATACTGAGCACATCAGCAGG<br>ACGCACTGACCGAATTCATTAAGAGGAGAAAAGGT<br>ACCAAGGAGGAACAGACATGGTTGCTGAATTGACC<br>GCATT |
| tyrA-3RPPst         | <u>AACTGCAGT</u> TACTGGCGATTGTCATTCGCC                                                                                                                                     |
| aroG-5FPPst         | <u>AACTGCAGA</u> AAGGAGGCCATCCATGAATTATCAGAA<br>CGACGA                                                                                                                     |
| aroG-3RPNot         | ATAAGAAT <u>GCGGCCGCT</u> TACCCGCGACGCGCTTTTA<br>CTG                                                                                                                       |
| ppsA-5FPNot         | ATAAGAAT <u>GCGGCCGCA</u> AAGGAGGCCATCCATGTCC<br>ACAATGGCTCGTCAC                                                                                                           |
| ppsA-3RPAfl         | ATAATCCTTAAGTTATTTCTTCAGTTCAGCCAG                                                                                                                                          |
| tktA-5FPBgl         | <u>GAAGATCT</u> AAGGAGATATACCATGTCTCACGTAAA<br>GAGCTTGCC                                                                                                                   |
| tktA-3RPPac         | TCCTTAATTAATTACAGCAGTTCTTTTGCTTTCCG                                                                                                                                        |
| Plac-tktA-5FPAfl    | <u>GCCTTAAGGT</u> AGAGGATCGAGATCGTTTAGGC                                                                                                                                   |
| aroE-5FPPac         | <u>TTAATTA</u> AAAGGAGATATACCATGGAAACCTATGCT<br>GTTTTTGGT                                                                                                                  |
| aroE-3RPNhe         | CTAGCTAGCTCACGCGACAATTCCTCCTGCAA                                                                                                                                           |
| aroD-5FPBam         | <u>CGGGATCC</u> AAGGAGATATACCATGAAAACCGTAACTGTA<br>AAAGATC                                                                                                                 |
| aroD-3RPPst         | <u>TTCTGCAGT</u> TATGCCTGGTGTAATAAGTTAATACC                                                                                                                                |
| aroB-5FPPst         | <u>AACTGCAGA</u> AAGGAGATATACCATGGAGCGTATTGTC<br>GTTACTCTGGGCGAACGTAGCTACCCAATTACCA                                                                                        |
| aroB-3RPNhe         | CTAGCTAGCTTACGCTGATTGACAATCGGCAATG                                                                                                                                         |
| Plac-5FPNhe         | CTAGCTAGCGTAGAGGATCGAGATCGTTTAGGC                                                                                                                                          |
| aroD-3RPNhe         | CTAGCTAGCTTATGCCTGGTGTAATAAGTTAATAC<br>C                                                                                                                                   |
| aro-5FPNco          | ATACCATGGCACCTGTTACAATTGAAAAGTTCCG                                                                                                                                         |
| aro-3RPSac          | CCGGAGCTCCTATTTTTTATTTCTTTTAAGTGCCG                                                                                                                                        |
| UGT-5FPNco          | ATACCATGGGCTCTGAAACTCGCCCGCTG                                                                                                                                              |
| UGT-3RPBam          | TCGGATCCTTAAACCTTCTTCAGCTTCAGTTC                                                                                                                                           |
| TrcUGT-5FPBgl       | <u>GAAGATCT</u> CCGACATCATAACGGTTCTG                                                                                                                                       |

Underlined parts indicated restriction sites.

**Table S3 DNA and protein sequences of synthesized genes and proteins**

| Gene                              | DNA/Protein Sequence                                                                                                                                                                                                                                                                                                                                                                                                                                                                                                                                                                                                                                                                                                                                                                                                                                                                                                                                                                                                                                                                                                                                                                                                                                  |
|-----------------------------------|-------------------------------------------------------------------------------------------------------------------------------------------------------------------------------------------------------------------------------------------------------------------------------------------------------------------------------------------------------------------------------------------------------------------------------------------------------------------------------------------------------------------------------------------------------------------------------------------------------------------------------------------------------------------------------------------------------------------------------------------------------------------------------------------------------------------------------------------------------------------------------------------------------------------------------------------------------------------------------------------------------------------------------------------------------------------------------------------------------------------------------------------------------------------------------------------------------------------------------------------------------|
| TyrA <sup>*syn</sup><br>(DNA)     | ATGGTTGCTGAATTGACCGCATTACGCGATCAAATTGATGAAGTCGATAAAGCGCT<br>GCTGAATTTATTAGCGAAGCGTCTGGAAGTGGTTGCTGAAGTGGGCGAGGTGAAA<br>AGCCGCTTTGGACTGCCTATTTATGTTCCGGAGCGCGAGGCATCTATTTTGGCCTCG<br>CGTCGTGCAGAGGCGGAAGCTCTGGGTGTACCGCCAGATCTGATTGAGGATGTTT<br>TGCCTCGGGTGTGCGTGAATCTTACTCCAGTAAAAACGACAAAGGATTTAAAAC<br>ACTTTGTCCGTCCTGCGTCCGGTGGTTATCGTCGGCGGTGGCGGTCAGATGGGA<br>CGCCTGTTTCGAGAAGATGCTGACCCCTCTCGGGTTATCAGGTGCGGATTCTGGAGC<br>AACATGACTGGGATCGAGCGGCTGATATTGTTGCCGATGCCGGAATGGTGATTGTT<br>AGTGTGCCAATCCACGTTACTGAGCAAGTTATTGGCAAATTACCGCCTTTACCGAA<br>AGATTGTATTCTGGTCGATCTGGCATCAGTAAAAATGGGCCATTACAGGCCATGC<br>TGGTGGCGCATGATGGTCCGGTGTCTGGGGCTACACCCGATGTTCCGGTCCGGACAG<br>CGGTAGCCTGGCAAAGCAAGTTGTGGTCTGGTGTGATGGACGTAAACCGGAAGCA<br>TACCAATGGTTTCTGGAGCAAATTCAGGTCTGGGGCGCTCGGCTGCATCGTATTAG<br>CGCCGTCGAGCACGATCAGAATATGGCGTTTATTCAGGCACTGCGCCACTTTGCTA<br>CTTTTGCTTACGGGCTGCACCTGGCAGAAGAAAATGTTTCAGCTTGAGCAACTTCT<br>GGCGCTCTCTTCGCCGATTTACCGCCTTGAGCTGGCGATGGTCCGGCGACTGTTTG<br>CTCAGGATCCGCAGCTTTATGCCGACATCATTATGTCGTCAGAGCGTAATCTGGCGT<br>TAATCAAACGTTACTATAAGCGTTTCGGCGAGGCGATTGAGTTGCTGGAGCAGGG<br>CGATAAGCAGGCGTTTATTGACAGTTTCCGCAAGGTGGAGCACTGGTTCGGCGATT<br>ACGTTTCAGCGTTTTTCAGAGTGAAAGCCGCGTGTATTGCGTCAGGCGAATGACAA<br>TCGCCAGTAA |
| TyrA <sup>*syn</sup><br>(Protein) | MVAELTALRDQIDEVDKALLNLLAKRLELVAEVGEVKSFRGLPIYVPEREASILASRR<br>AEAEALGVPPDLIEDVLRVMRESYSSENDKGFKTLCPSLRPVIVGGGQMGRLFE<br>KMLTLSGYQVRILEQHDWDRAADIVADAGMVIVSVPIHVTEQVIGKLPPLPKDCILVD<br>LASVKNGLQAMLVAHDGPVGLHPMFGPDSGLAKQVVVWCDGRKPEAYQWFLE<br>QIQVWGARLHRISAVEHDQNMAFIQALRHFATFAYGLHLAEENVQLEQLLALSSPIYR<br>LELAMVGRLFAQDPQLYADIIMSSERNLALIKRYYKRFGEAIELLEQGDQAFIDFRK<br>VEHWFGDYVQRFQSESRLRQANDNRQ                                                                                                                                                                                                                                                                                                                                                                                                                                                                                                                                                                                                                                                                                                                                                                                                                                                   |
| aroG <sup>*syn</sup><br>(DNA)     | ATGAATTATCAGAACGACGATTTACGCATCAAAGAAATCAAAGAGTTACTTCCTCC<br>TGTCGCATTGCTGGAAAAATCCCCGCTACTGAAAATGCCGGAATACGGTTGCC<br>ATGCCCGAAAAGCGATCCATAAGATCCTGAAAGGTAATGATGATCGCCTGTTGGTT<br>GTGATTGGCCCATGCTCAATTCATGATCCTGTCGCGGCAAAAGAGTATGCCACTCG<br>CTTGCTGGCGCTGCGTGAAGAGCTGAAAGATGAGCTGGAAATCGTAATGCGCGTC<br>TATTTTGAAAAGCCGCGTACCACGGTGGGCTGGAAAGGGCTGATTAACGATCCGC<br>ATATGGATAATAGCTTCCAGATCAACGACGGTCTGCGTATAGCCCGTAAATTGCTGC<br>TTGATATTAACGACAGCGGTCTGCCAGCGGCAGGTGAGTTTCTCAATATGATCACC<br>CCACAATATCTCGCTGACCTGATGAGCTGGGGCGCAATTGGCGCACGTACCACCG<br>AATCGCAGGTGCACCGCAACTGGCATCAGGGCTTTCTTGTCGGTCCGGCTTCAA<br>AAATGGCACCGACGGTACGATTAAAGTGGCTATCGATGCCATTAATGCCGCCGGTG<br>CGCCGCACTGCTTCTGTCCGTAACGAAATGGGGGCATTCGGCGATTGTGAATACC<br>AGCGGTAACGGCGATTGCCATATCATTCTGCGCGGCGTAAAGAGCCTAACTACAG<br>CGCGAAGCACGTTGCTGAAGTGAAAGAAGGGCTGAACAAAGCAGGCCTGCCAGC                                                                                                                                                                                                                                                                                                                                                                                             |

|                                  |                                                                                                                                                                                                                                                                                                                                                                                                                                                                                                                                                                                                                                                                                                                                                                                                                                                                                                                                                                                                                                                                                                                                                                                                                                                                                                                                                                                                                                                                                                                                                                                           |
|----------------------------------|-------------------------------------------------------------------------------------------------------------------------------------------------------------------------------------------------------------------------------------------------------------------------------------------------------------------------------------------------------------------------------------------------------------------------------------------------------------------------------------------------------------------------------------------------------------------------------------------------------------------------------------------------------------------------------------------------------------------------------------------------------------------------------------------------------------------------------------------------------------------------------------------------------------------------------------------------------------------------------------------------------------------------------------------------------------------------------------------------------------------------------------------------------------------------------------------------------------------------------------------------------------------------------------------------------------------------------------------------------------------------------------------------------------------------------------------------------------------------------------------------------------------------------------------------------------------------------------------|
|                                  | ACAGGTGATGATCGATTTTCAGCCATGCTAACTCGTCCAAAACAATTCAAAAAGCAGA<br>TGGATGTTTGTGCTGACGTTTGCCAGCAGATTGCCGGTGGCGAAAAGGCCATTATT<br>GGCGTGATGGTGGAAAGCCATCTGGTGGAAAGGCAATCAGAGCCTCGAGAGCGGG<br>GAGCCGCTGGCCTACGGTAAGAGCATACCGATGCCTGCATCGGCTGGGAAGATA<br>CCGATGCTCTGTTACGTCAACTGGCGAATGCAGTAAAAGCGCGTCCGCGGGTAA                                                                                                                                                                                                                                                                                                                                                                                                                                                                                                                                                                                                                                                                                                                                                                                                                                                                                                                                                                                                                                                                                                                                                                                                                                                                                     |
| aroG <sup>syn</sup><br>(protein) | MNYQNDDLRIKEIKELLPPVALLEKFPATENAANTVAHARKAIHKILKGNDDRLLVVI<br>GPCSIHDPVAAKEYATRLLALREELKDELEIVMRVYFEKPRTTVGWKGLINDPHMDN<br>SFQINDGLRIARKLLLDINDSGLPAAGEFLNMITPQYLADLMSWGAIGARTTESQVHR<br>ELASGLSCPVGFKNGTDGTIKVAIDAINAAGAPHCFLSVTKWGHSAIVNTSNGNDCHI<br>ILRGGKEPNYSAKHVAEVKEGLNKAGLPAQVMIDFSHANSSKQFKKQMDVCADVQC<br>QIAGGEKAIIGVMVESHLVEGNQSLESGEPLAYGKSITDACIGWEDTDALLRQLANAV<br>KARRG                                                                                                                                                                                                                                                                                                                                                                                                                                                                                                                                                                                                                                                                                                                                                                                                                                                                                                                                                                                                                                                                                                                                                                                                    |
| 73B6 <sup>syn</sup><br>(DNA)     | ATGGGCTCTGAAACTCGCCCGCTGAGCATCTTCTTTTTTCCGTTTATGGCGCATGGC<br>CACATGATTCCGATGGTGGATATGGCACGTCTGTTTGCTTCTCAGGGTGTGCGTTG<br>CACCATTGTTACCACTCCGGGTAACCAGCCGCTGATTGCTCGCTCTATCGGTAAGG<br>TTCAGCTGCTGGGTTTTGAAATTGGTGTGACTACTATCCCCTCCGCGGACTGAG<br>TTCGGCCTGCCGGATGGCTGTGAAAACCTGGATAGCGTGCCGAGCCCGCAGCATG<br>TGTTTCATTCTTTGAGGCAGCGGGTAGCCTGCGTGAGCCGTTTGAACAGCTGCTG<br>GAAGAGCACAAACCGGACTGTGTTGTGGGCGATATGTTCTTTCCGTGGTCTACCG<br>ACTCTGCGGCTAAATTCGGTATTCCGCGCCTGGTTTTCCACGGTACCTCCTACTTCG<br>CGCTGTGCGCTGGCGAAGCAGTGCGTATTCATAAGCCGTACCTGTCTGTGCTTCT<br>GATGATGAACCGTTCGTTATTCCGGGCTGCCGGACGAGATCAAAGTACCAAGT<br>CCCAGCTGCCGATGCACCTGCTGGAGGGTAAGAAAGACTCTGTTCTGGCACAGCT<br>GCTGGATGAGGTGAAAGAACTGAGGTTTCTCTTACGGTGTATCGTTAACTCTA<br>TCTACGAACTGGAACCGGCTTACGCAGATTACTTCCGTAACGTTCTGAAGCGCCGT<br>GCGTGGGAGATCGGTCCGCTGTCTCTGTGTAACCGTGACGTTGAAGAGAAAAGCGA<br>TGCGTGGTATGCAGGCTGCTATCGATCAGCATGAATGCCTGAAATGGCTGGATTCC<br>AAAGAACCGGATCCGTTGTTTACGTTTGTGTTTGGTAGCACTTGCAAATCCCGGA<br>TGATCAGCTGGCGGAAATCGCGTCTGGTCTGGAGGCAAGCGGCCAGCAGTTCATC<br>TGGGTTATTCGCCGTATGTCTGACGACTCTAAGGAAGACTACCTGCCGAAAGGTTT<br>CGAAGAGCGTGTTAAGGACCGTGCTCTGCTGATTGCGGGTGGGCTCCGAGGTT<br>CTGATCCTGGACCATCAGTCCGTTGGCGGTTTTGTTTCTACTGTGGTTGGAATC<br>TACCCTGGAAGGCATCAGCGCGGGTCTGCCGATGGTACTTGGCCGGTGTTCGCT<br>GAACAGTTCTACAACGAAAACTGCTGACCGAGGTGCTGAAAATCGGTGTTGCA<br>GTGGGTGCTCGTAAGTGGCGTCAGCTGGTGGGTGACTTCGTTACAAAAGACGCTA<br>TTCAGCGTGGGTCGCTGAAATTATGGAGGGCGAAGAGGCGGAGGAACGTCGTAT<br>CATCGCGCTCAGATGGGTAAAATGGCGAAACGCGCGGTGGAGAAGGACGGTAG<br>CTCTGGACCAACCTGAACAACCTGCTGCAGGAACTGAAGCTGAAGAAGGTTTA<br>A |
| 73B6 <sup>syn</sup><br>(protein) | MGSETRPLSIFFFPFMAHGHMIPMVDMARLFASQGVRCITVTPGNQPLIARSIGKVQ<br>LLGFEIGVTTIPFRGTEFGLPDGCENLDSVPSPQHVFHFFEAAGSLREPFEQLLEHKP<br>DCVVGDMFFPWSTDSAAKFGIPRLVFHGTSYFALCAGEAVRIHKPYLSVSSDDEPFVI<br>PGLPDEIKLTKSQLPMHLEGGKDSVLAQLLDEVKETEVSYSYGIVNSIYELEPAYAD<br>YFRNVLKRRAWEIGPLSLCNRDVEEKAMRGMQA AIDQHECLKWLDSEKPSVVVY                                                                                                                                                                                                                                                                                                                                                                                                                                                                                                                                                                                                                                                                                                                                                                                                                                                                                                                                                                                                                                                                                                                                                                                                                                                                             |

---

|                                                                                                                                                                                                           |
|-----------------------------------------------------------------------------------------------------------------------------------------------------------------------------------------------------------|
| CFGSTCKFPDDQLAEIASGLEASGQQFIWVIRMSDDSKEDYLPKGFEERVKDRALLI<br>RGWAPQVLILDHQSVGGFVSHCGWNSTLEGISAGLPMVTWPVFAEQFYNEKLLTEV<br>LKIGVAVGARKWRQLVGDFVHKDAIQRAVREIMEGEEAEERRIARQMGKMAKRA<br>VEKDGSSWTNLNLLQELKLLKV |
|-----------------------------------------------------------------------------------------------------------------------------------------------------------------------------------------------------------|

---
